# Supplementary material for: Multi-target antibacterial Ru-based metallodrugs containing phenylsulfonyl indole derivatives: synthesis and their efficacy against Gram-positive and -negative bacteria
Source: Royal Society of Chemistry journal article supplement (doi:10.1039/d5ra03098f), 2025-01-01
Supplement: d5ra03098f1.pdf [file d5ra03098f1.pdf]

## Supporting Information

### **Multi-target antibacterial Ru-based metallodrugs containing phenylsulfonyl indole derivatives: Synthesis and their efficacy against Gram-positive and negative bacteria**

Shijie Lin<sup>a§</sup>, Guangying Yu<sup>c§</sup>, Liu Zhang<sup>c§</sup>, Xiangwen Liao<sup>c</sup>, Guijuan Jiang<sup>c\*</sup>, Lianghong Liu<sup>b\*</sup>

[a] Department of Pharmacy, Hainan General Hospital (Hainan Affiliated Hospital of Hainan Medical University), Haikou, 570311, China

[b] School of Pharmaceutical Sciences, Hunan University of Medicine, Huaihua, 418000, China

[c] School of Pharmacy, Jiangxi Science & Technology Normal University, Nanchang, 330013, China

§ These authors contribute equally to this work

\*Correspondence author:

E-mail: [jgjchem@163.com](mailto:jgjchem@163.com), [llhfe@qq.com](mailto:llhfe@qq.com)

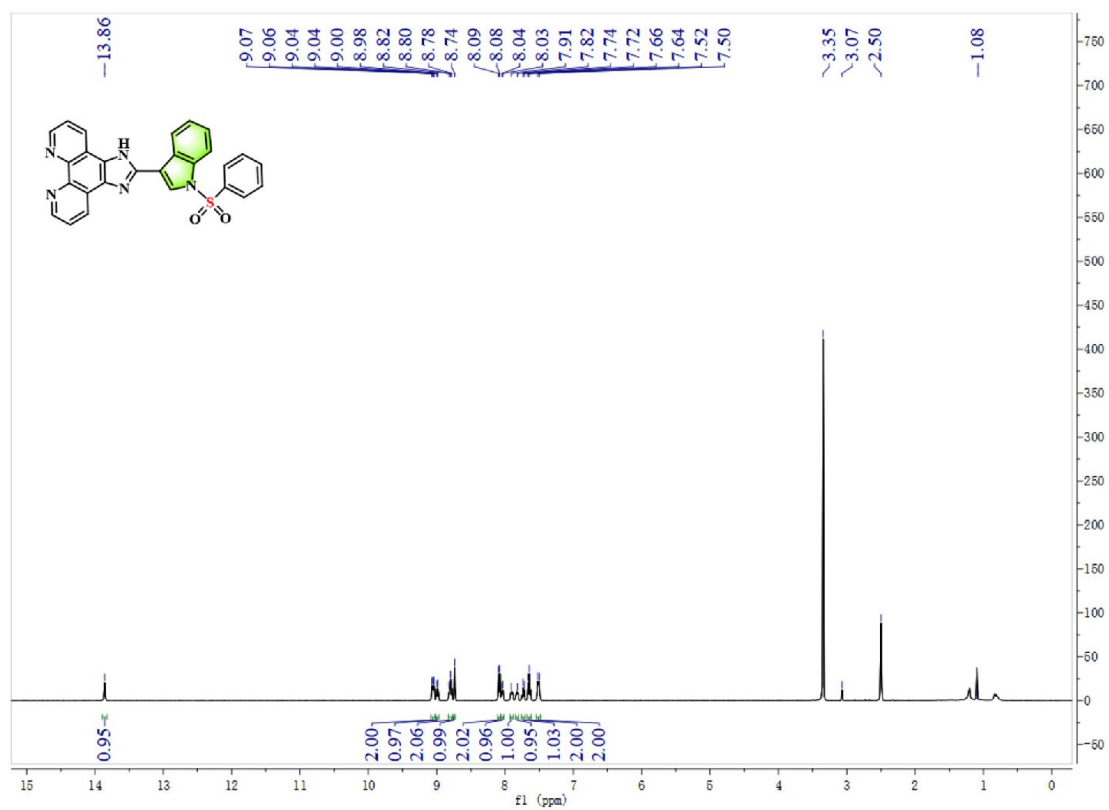

**Figure S1** The <sup>1</sup>H-NMR spectra of ligand (CHNOS)

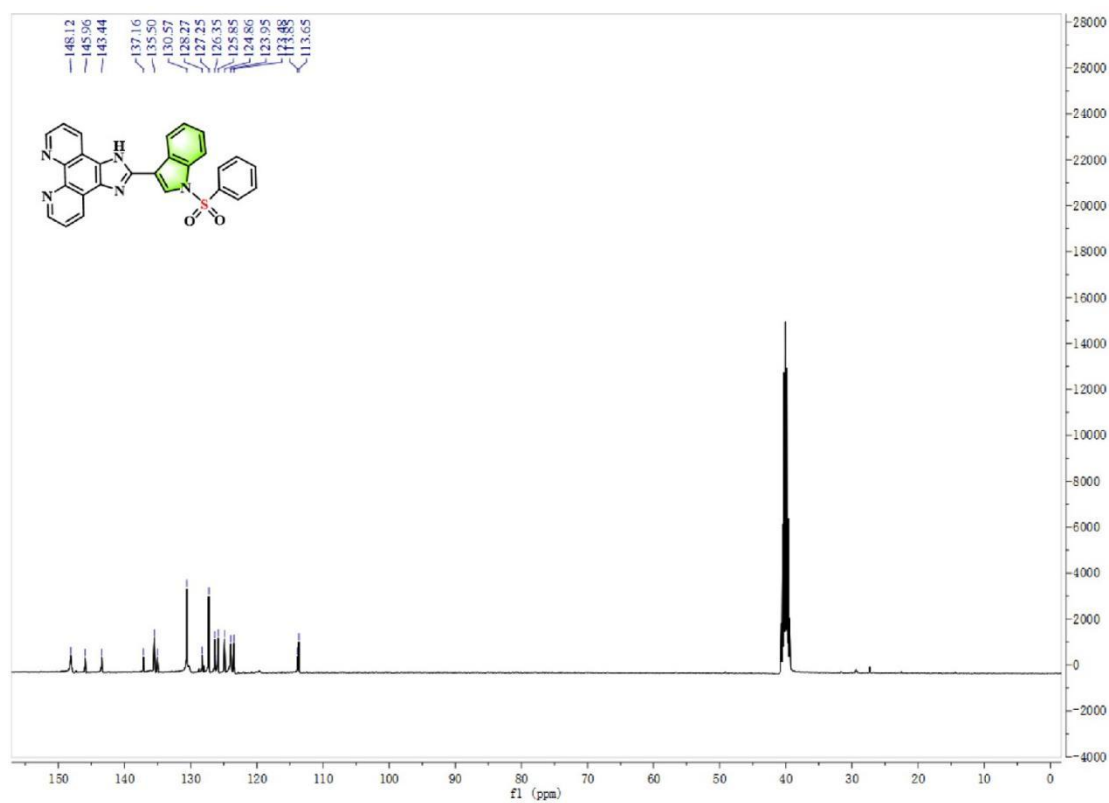

**Figure S2** The <sup>13</sup>C-NMR spectra of ligand (CHNOS)

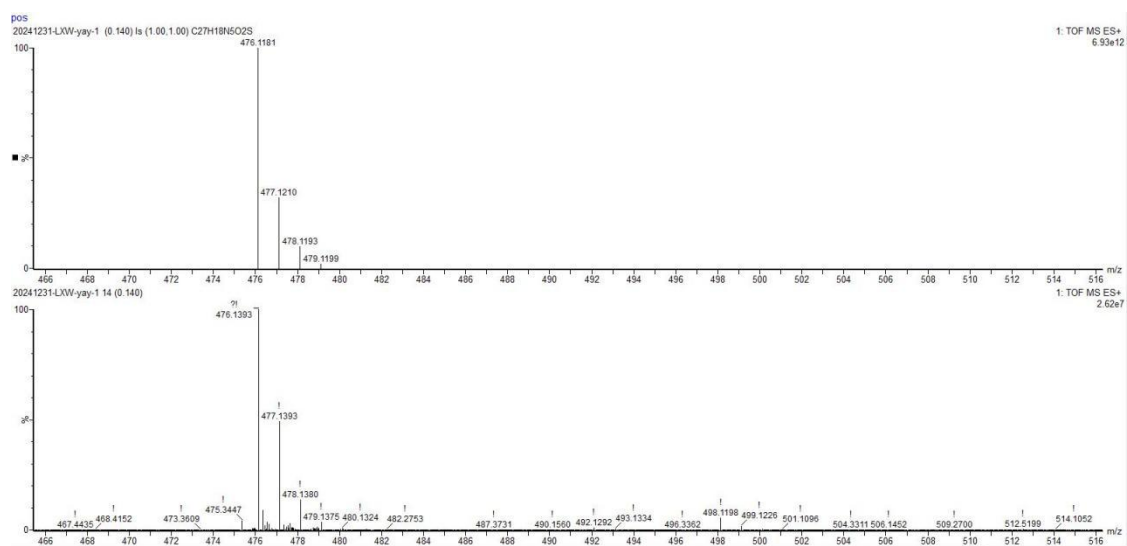

**Figure S3** The HMRS of ligand (CHNOS)

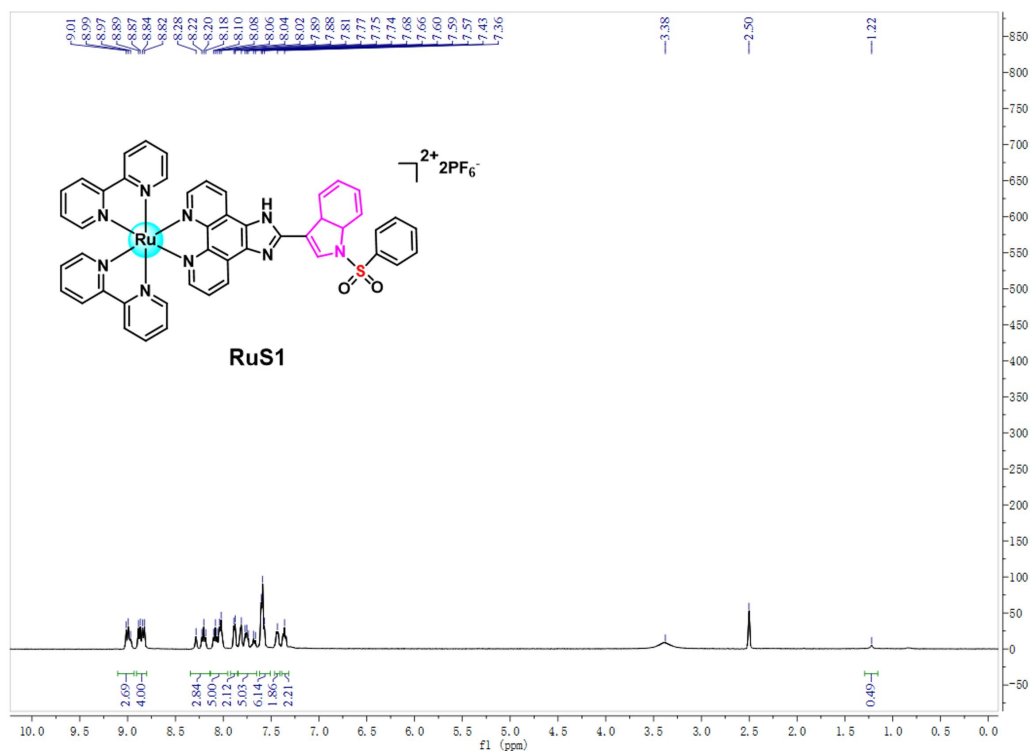

Figure S4 The  $^1H$ -NMR spectra of RuS1

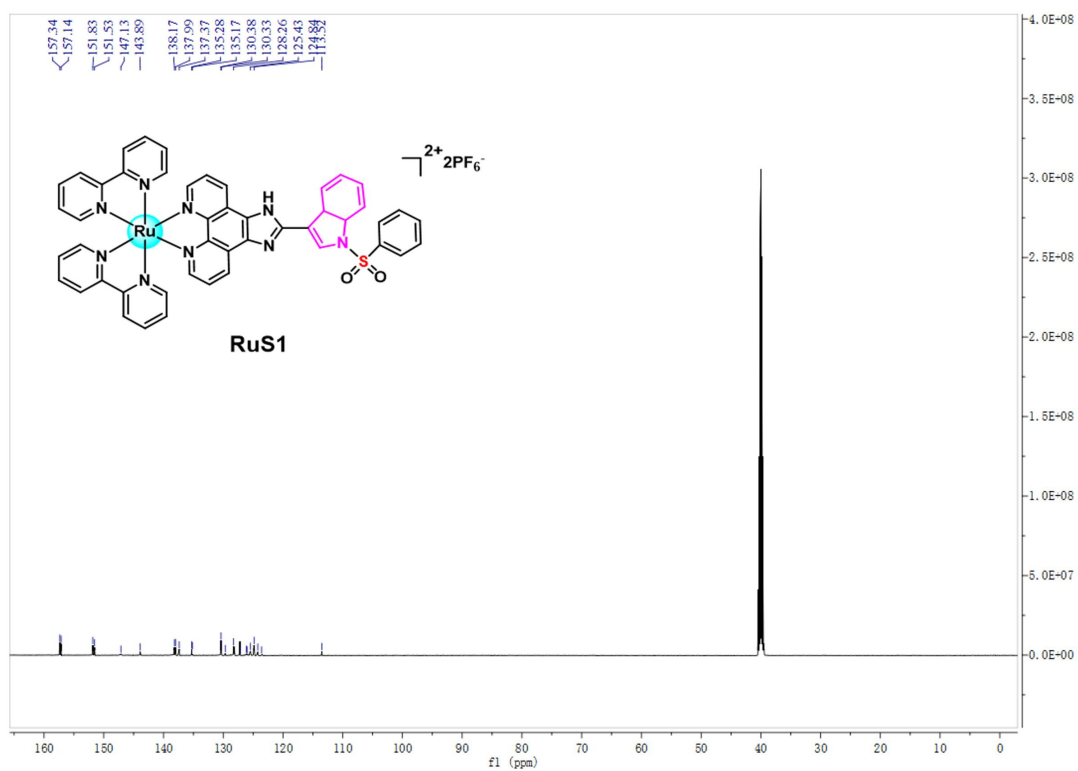

Figure S5 The  $^{13}C$ -NMR spectra of RuS1

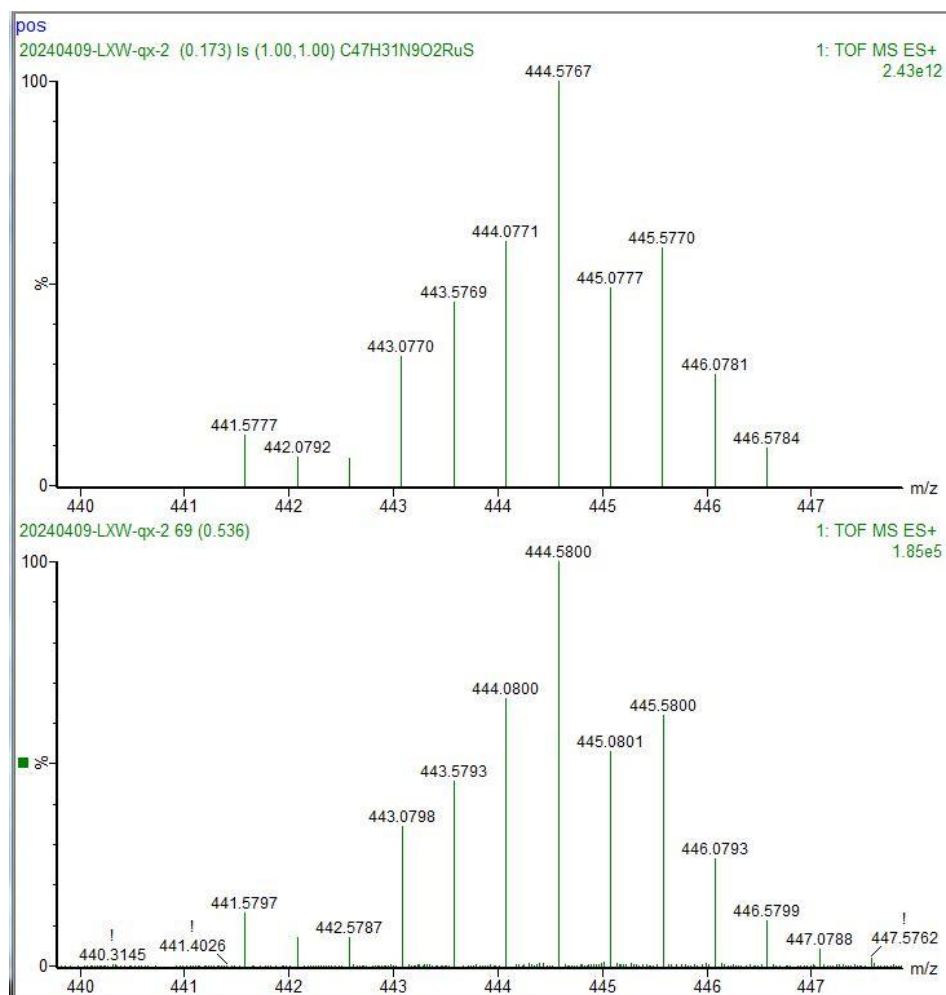

Figure S6 The HMRS of RuS1

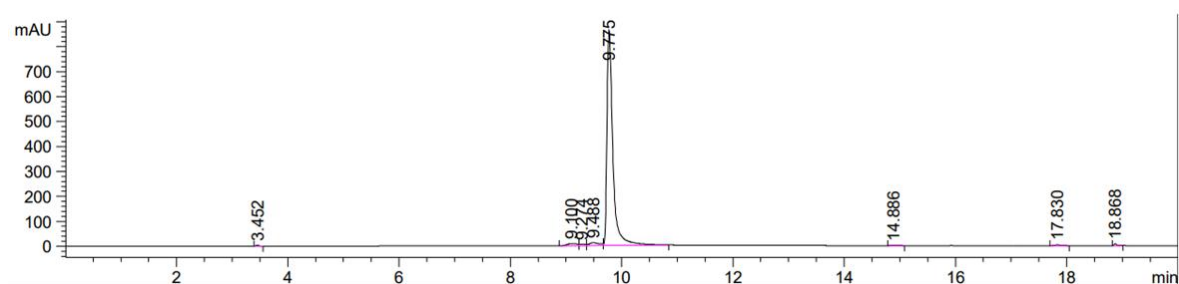

Figure S7 The high performance liquid chromatography of RuS1 (HPLC)

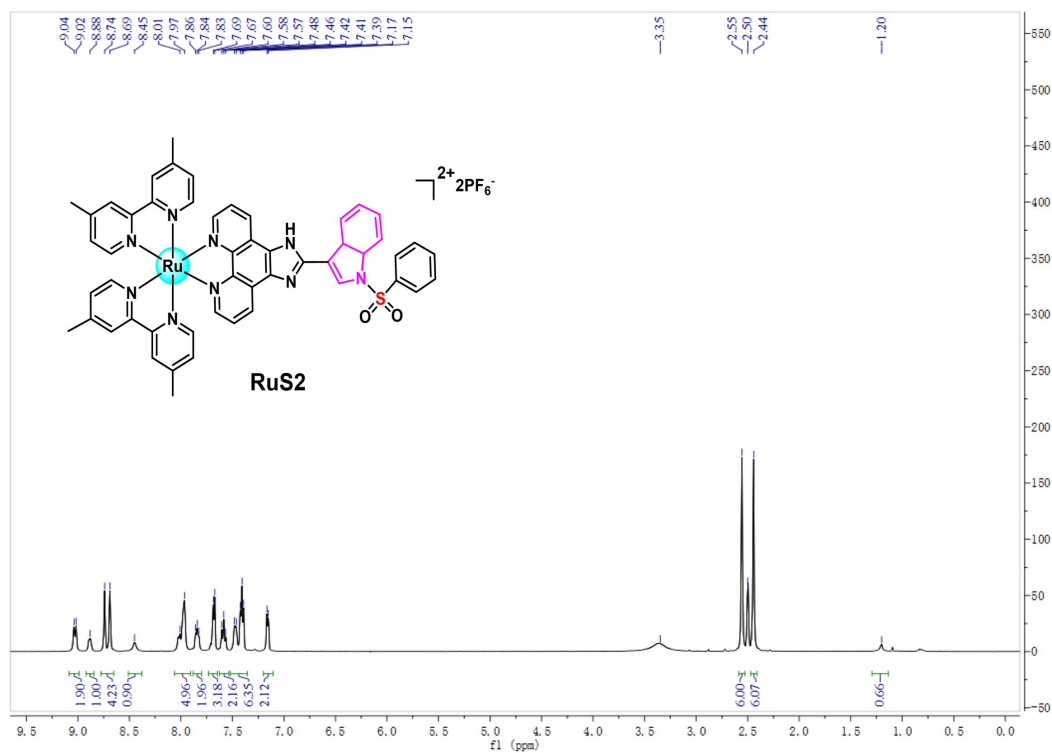

Figure S8 The  $^1\text{H}$ -NMR spectra of RuS2

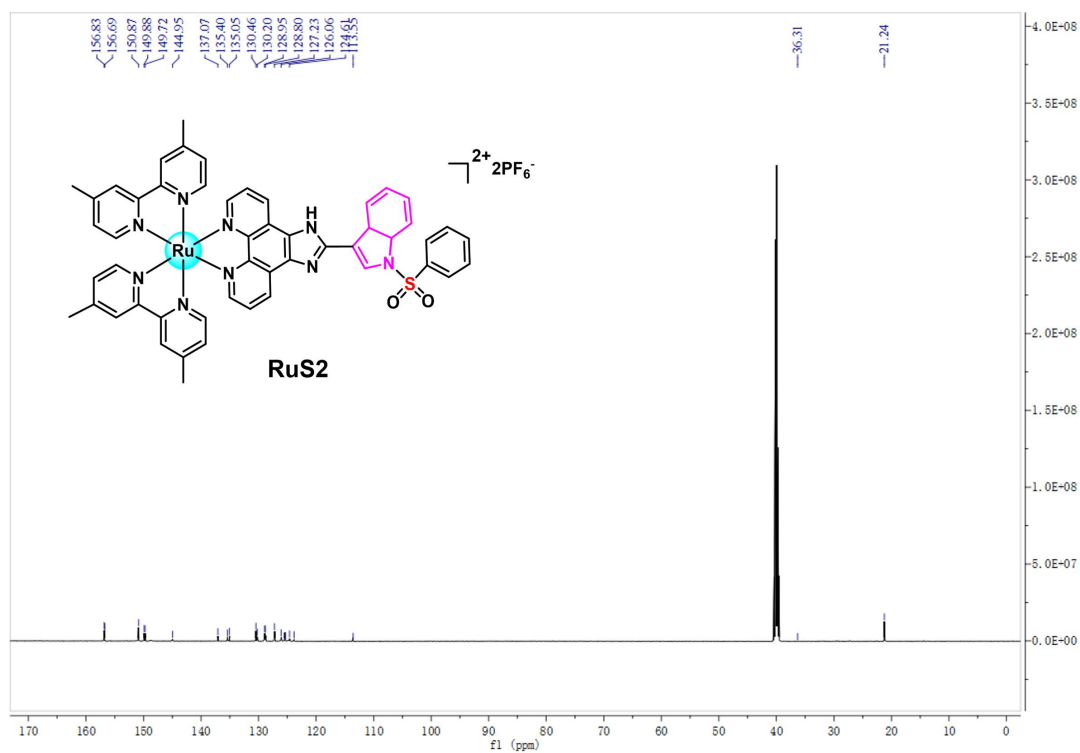

Figure S9 The  $^{13}\text{C}$ -NMR spectra of RuS2

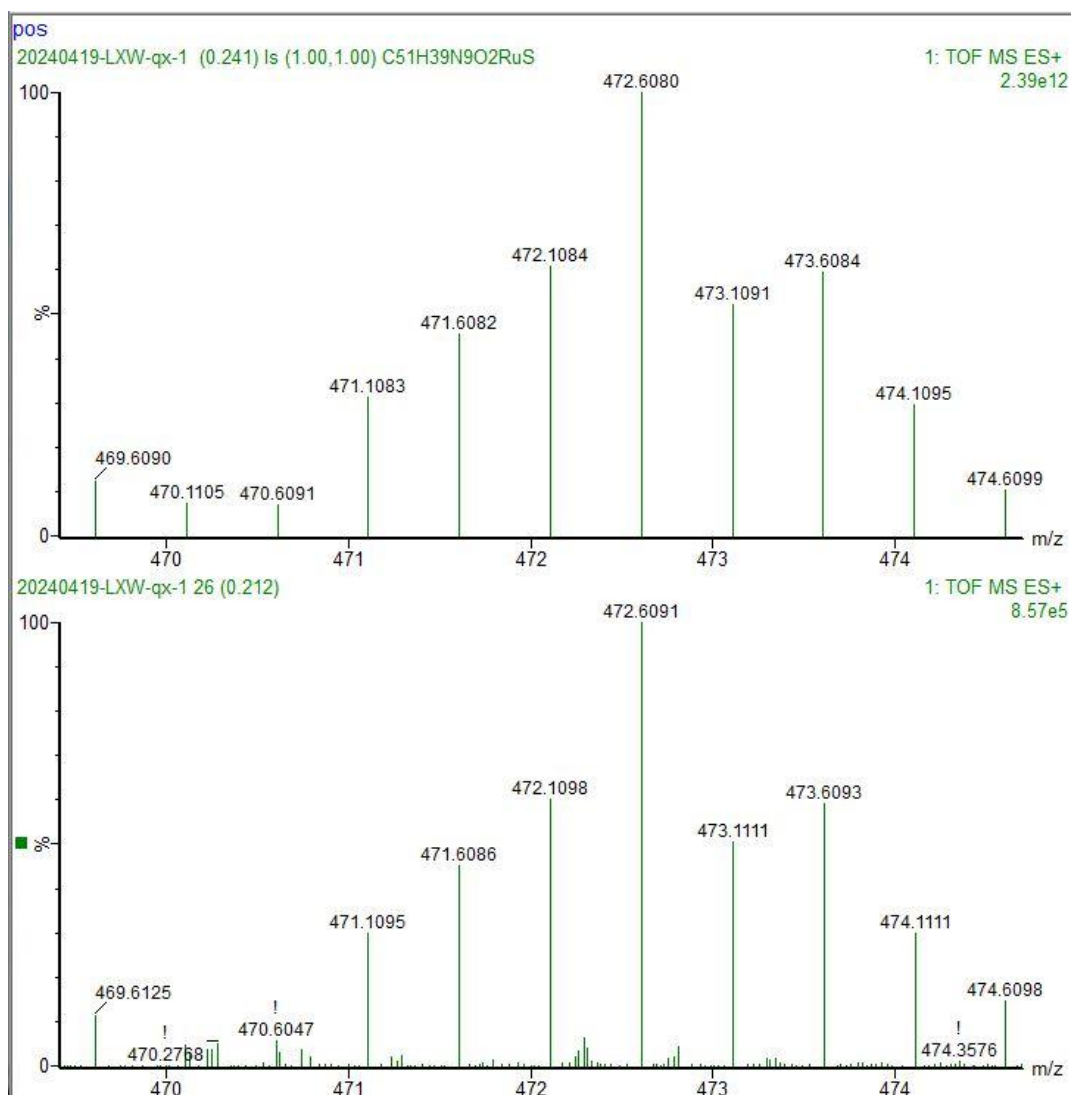

**Figure S10** The HMRS of RuS2

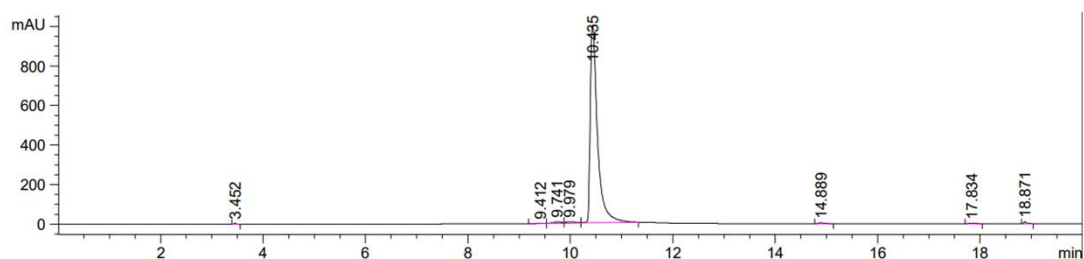

**Figure S11** The high performance liquid chromatography of RuS2 (HPLC)

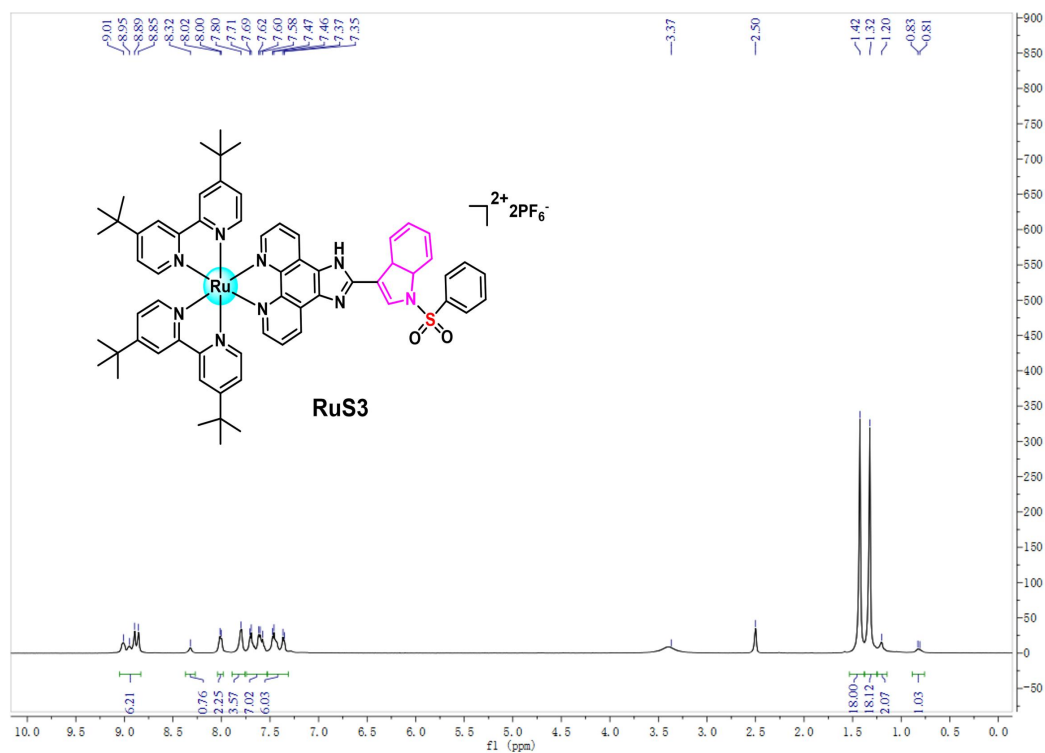

Figure S12 The  $^1\text{H}$ -NMR spectra of RuS3

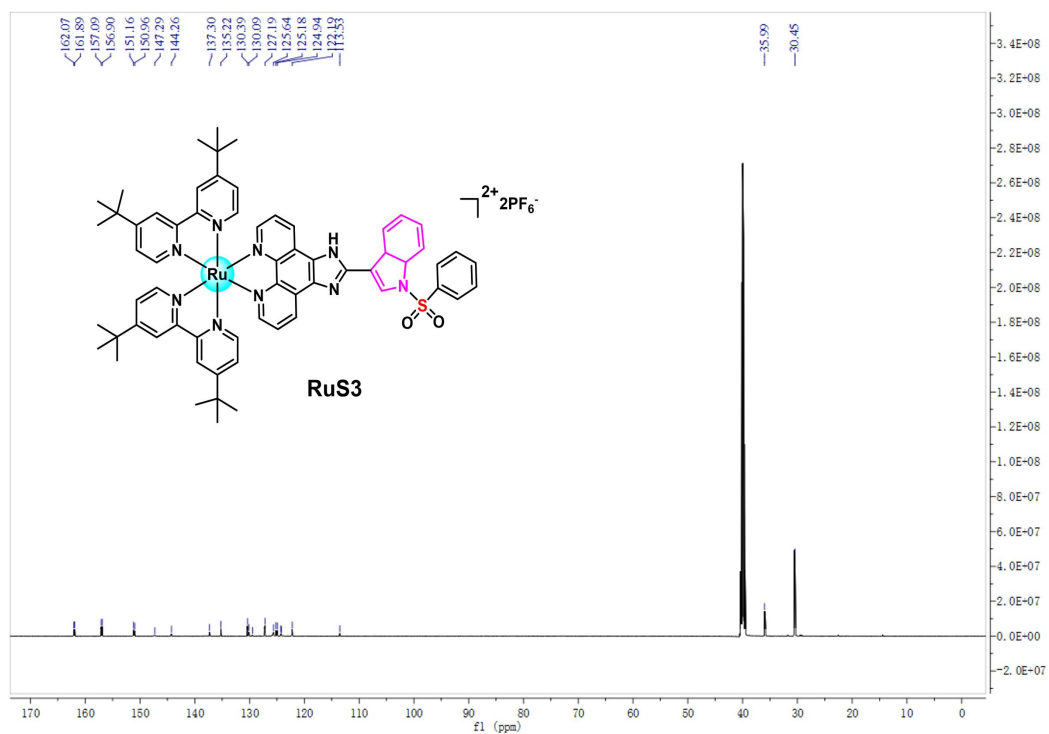

Figure S13 The  $^{13}\text{C}$ -NMR spectra of RuS3



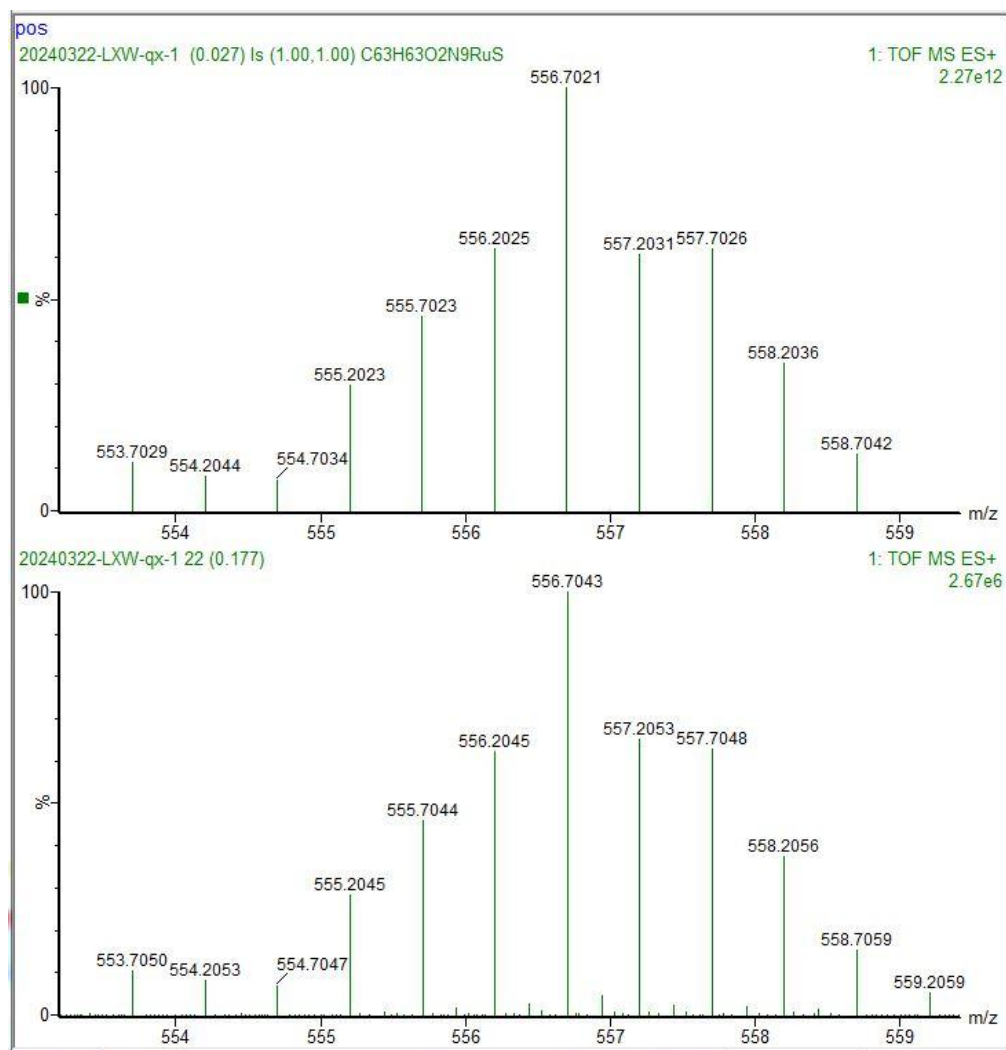

**Figure S14** The HMRS of **RuS3**

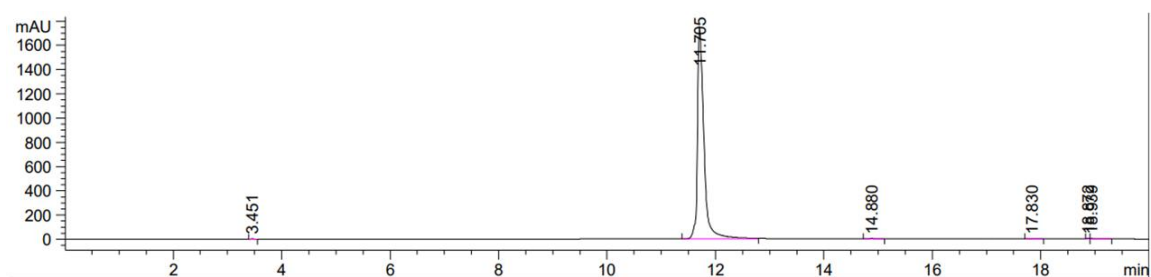

**Figure S15** The high performance liquid chromatography of **RuS3** (HPLC)

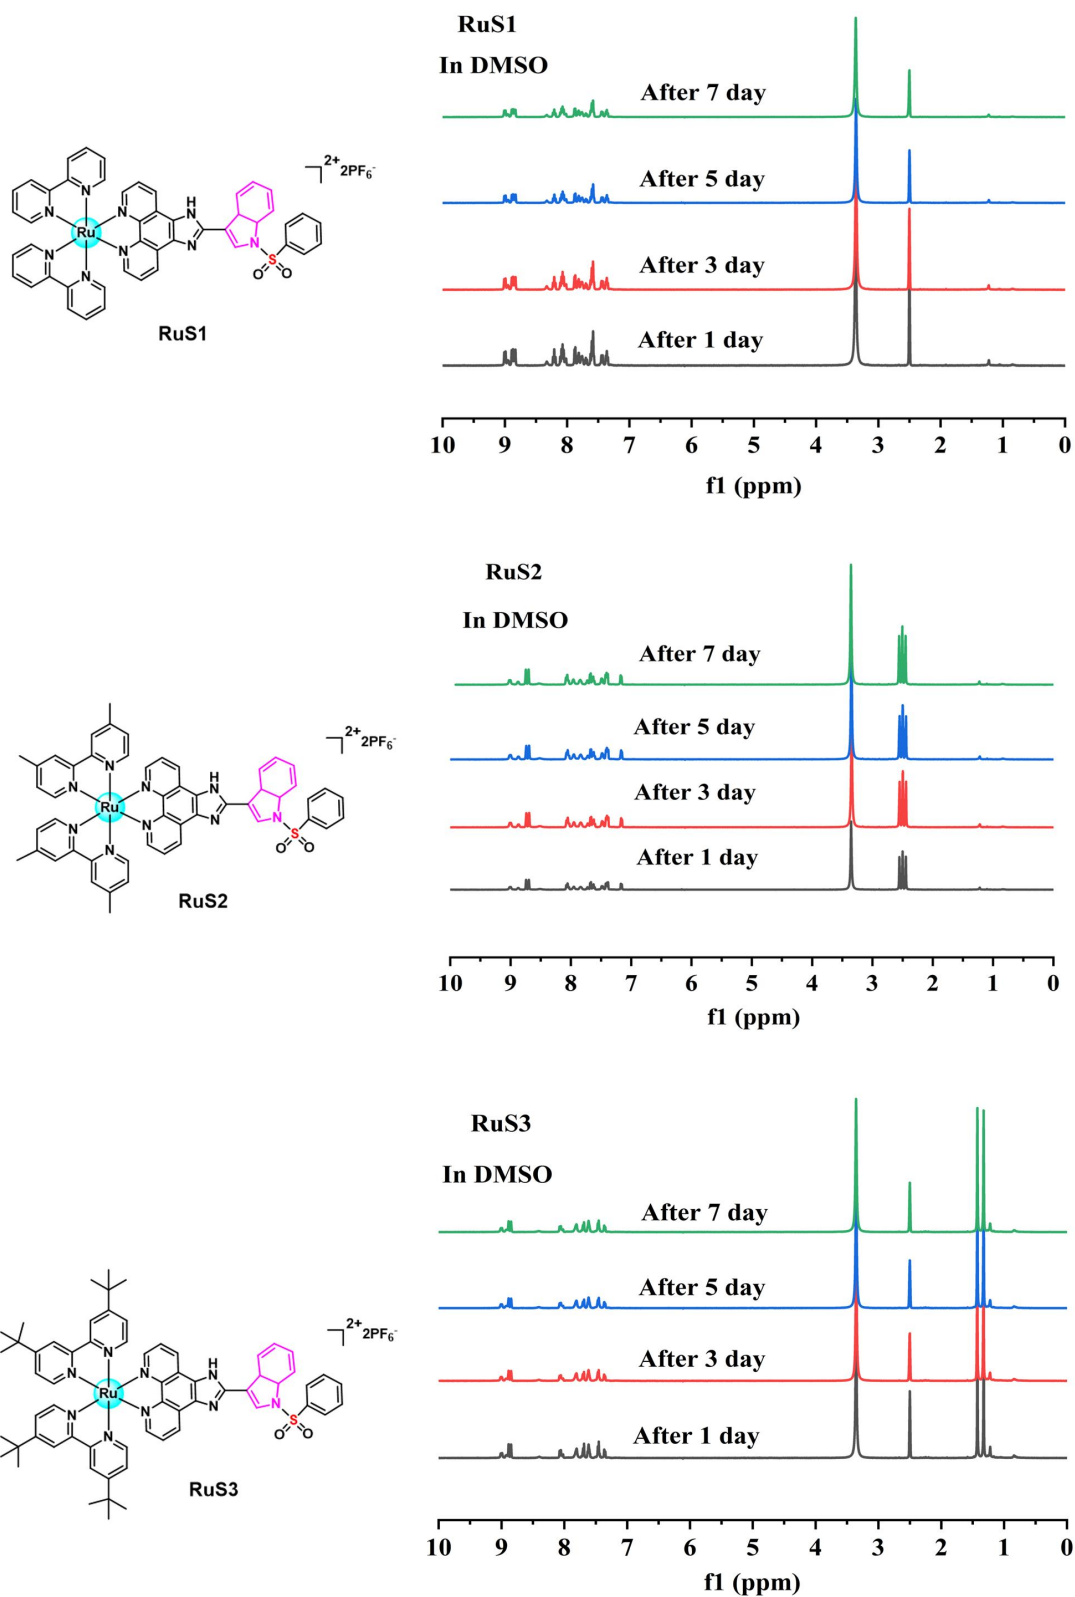

**Figure S16** The stability of **RuS1**, **RuS2** and **RuS3** were confirmed by <sup>1</sup>H-NMR

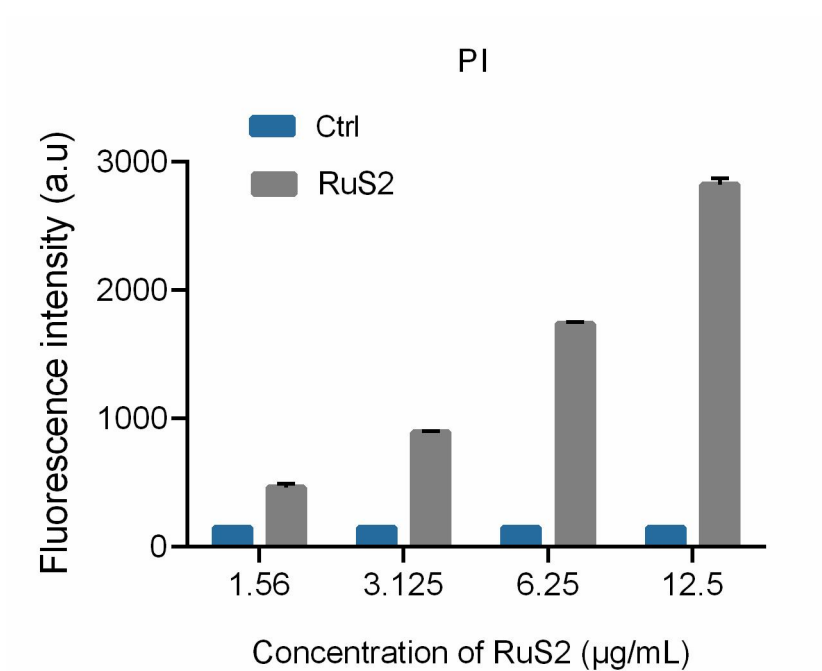

**Figure S17** The fluorescence intensity of *S. aureus* stained by PI after co-incubated with **RuS2**

**Table S1.** Minimum inhibitory concentration (MIC) values of **RuS2** against drug-resistant *S. aureus* (MRSA) isolated from the clinic.

| Compound         | MIC µg/mL  |
|------------------|------------|
| <b>RuS2</b>      | 0.98       |
| Oxacillin        | Resistance |
| Benzylpenicillin | Resistance |
